# Supplementary material
Source: PubMed Central journal article supplement (PMC3294879)

## Supplemental Materials (AAC05958-11)

SUPPL. FIG. 1. Chemical structures of FOS, TOB and five possible FOS:TOB adducts.

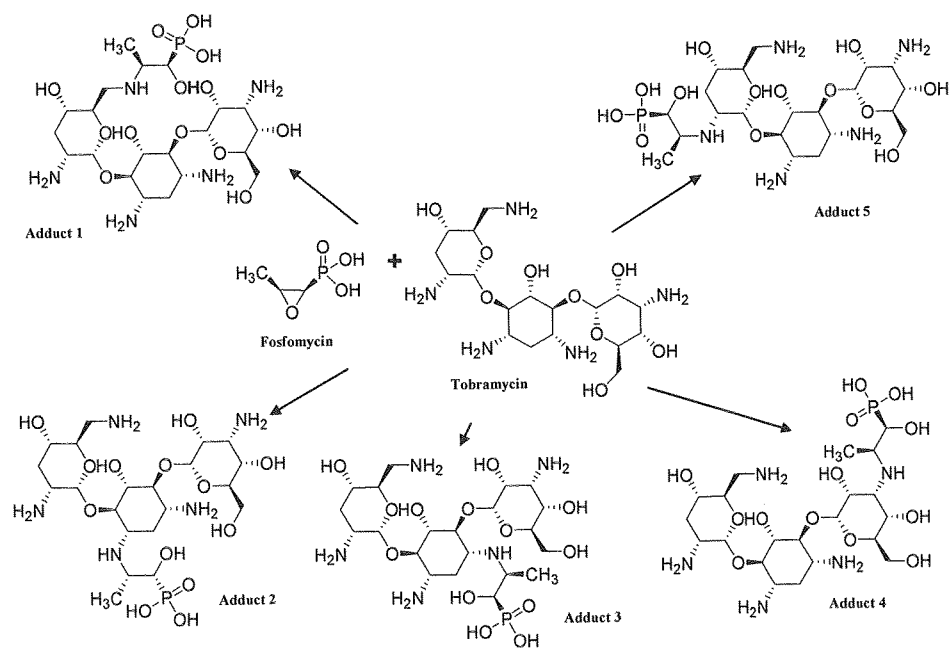

Figure 2. Chemical structures of possible Fosfomicin/Tobramycin adducts

**SUPPL. FIG. 2.** Extracted ion chromatograms (EIC) of  $m/z=606$  for samples incubated at rt, 37°C and 89°C

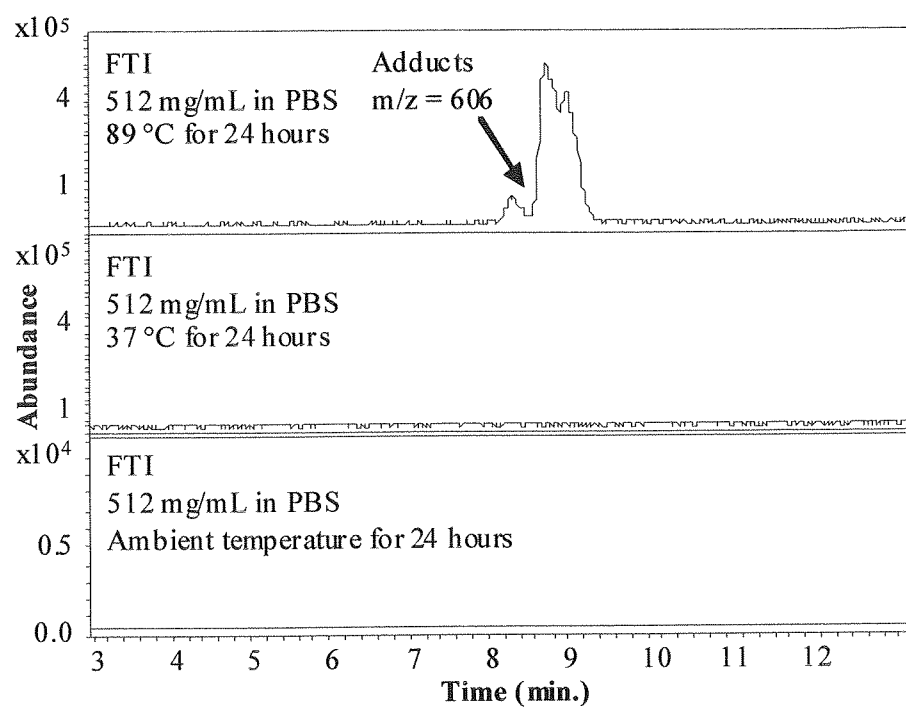

Supplement: supp_56.3.1529_FigS1-S2.pdf [file supp_56.3.1529_FigS1-S2.pdf]
